# Supplementary material for: Temporal Proteome and Lipidome Profiles Reveal Hepatitis C Virus-Associated Reprogramming of Hepatocellular Metabolism and Bioenergetics
Source: PLoS Pathog. 2010 Jan 8;6(1):e1000719. doi: 10.1371/journal.ppat.1000719 (PMC2796172; doi:10.1371/journal.ppat.1000719)
Supplement: Table S2 — Select list of altered protein abundances reflecting perturbations in host metabolism and adaptive responses during HCV infection. Fold-change in protein abundance and accompanying P-values were calculated in Elucidator as described in Table S1. Differentially regulated proteins (>1.5-fold change, P-Value<0.05) exhibiting statistically significant increases in abundance are highlighted in red and those exhibiting statistically significant decreases in abundance are highlighted in green. Functional categories represented include glycolysis, the pentose phosphate pathway, and the tricarboxylic acid (TCA) cycle whose constituents are listed in their order of appearance in the appropriate pathway. For all other functional categories typically representing a broader spectrum of activities including pyruvate metabolism, oxidative phosphorylation, glutamate metabolism, fatty acid oxidation, nucleotide biosynthesis and homeostasis, lipogenesis, chaperones, and NRF2 stress response the proteins have been arranged in order of the fold-change observed in the HCVcc sample at 24 h post-infection. (0.07 MB XLS) [file ppat.1000719.s002.xls]

## Sheet: Sheet1
Protein IPI	Functional Category	HUGO	Protein Name	HCV 24h Fold Change	HCV 24h P-Value	HCV 48h Fold Change	HCV 48h P-Value	HCV 72h Fold Change	HCV 72h P-Value	UV 24h Fold Change	UV 24h P-Value	UV 48h Fold Change	UV 48h P-Value	UV 72h Fold Change	UV 72h P-Value
IPI00027497	GLYCOLYSIS	GPI	GLUCOSE-6-PHOSPHATE ISOMERASE	2.74397	0.03813	1.67517	0.20924	1.07319	0.80557	1.32801	0.33462	-1.6917	0.07918	-2.01932	0.02688
IPI00465439	GLYCOLYSIS	ALDOA	FRUCTOSE-BISPHOSPHATE ALDOLASE A	2.42895	2e-05	1.46198	0.11131	1.66945	0.11496	1.32964	0.59374	1.04267	0.88587
IPI00465028	GLYCOLYSIS	TPI1	TRIOSEPHOSPHATE ISOMERASE 1	2.6928	9.52e-08	1.31562	0.01729	1.2658	0.19092	2.08612	8.19e-07	-1.07983	0.70911	1.05613	0.85429
IPI00169383	GLYCOLYSIS	PGK1	PHOSPHOGLYCERATE KINASE 1	1.82175	0.06287	1.38944	0.20062	3.12955	0.00249	1.40722	0.4616	-2.26912	0.0364	2.01698	0.0447
IPI00385244	GLYCOLYSIS	PGAM1	PHOSPHOGLYCERATE MUTASE 1	2.04585	0.00045	1.26512	0.11145	1.60896	0.08638	1.1778	0.81041	-2.69007	0.01504	-1.04618	0.93104
IPI00465248	GLYCOLYSIS	ENO1	ALPHA ENOLASE	2.04167	7e-05	1.19395	0.18482	2.6229	0.08382	-1.19132	0.37136	-3.50361	9.35e-09	2.78953	3e-05
IPI00217966	GLYCOLYSIS	LDHA	L-LACTATE DEHYDROGENASE A CHAIN	3.1934	0.01213	4.81061	2.28e-10			-1.77672	0.09867
IPI00219525	PENTOSE PHOSPHATE PATHWAY	PGD	6-PHOSPHOGLUCONATE DEHYDROGENASE, DECARBOXYLATING	1.60009	0.11528	3.28183	0.10125	9.45681	4e-05	-2.79893	0.16322
IPI00021716	PENTOSE PHOSPHATE PATHWAY	TKT	TRANSKETOLASE	1.93987	1.54e-06	1.48451	0.17375	-1.11697	0.85071			-1.79107	0.02986	1.50283	0.35895
IPI00024102	PENTOSE PHOSPHATE PATHWAY	TALDO1	TRANSALDOLASE	1.94701	0.00414	1.84871	0.06297	2.68865	2e-05	1.89611	0.03177	-1.5102	0.09252
IPI00027165	PYRUVATE METABOLISM	PKLR	SPLICE ISOFORM R-TYPE OF PYRUVATE KINASE, ISOZYMES R/L	3.21897	0.21332	6.14024	0.00207
IPI00299402	PYRUVATE METABOLISM	PC	PYRUVATE CARBOXYLASE, MITOCHONDRIAL PRECURSOR	1.82694	0.00984
IPI00329391	PYRUVATE METABOLISM	DLAT	DIHYDROLIPOAMIDE S-ACETYLTRANSFERASE	1.78886	0.14172	1.90092	8e-05			-2.97419	4.41e-06
IPI00294380	PYRUVATE METABOLISM	PCK2	PHOSPHOENOLPYRUVATE CARBOXYKINASE, MITOCHONDRIAL PRECURSOR	1.34517	0.31595	-2.8953	0.00292	2.84695	0.00289	-6.09347	0.00018	-3.61282	0.00051
IPI00306301	PYRUVATE METABOLISM	PDHA1	PYRUVATE DEHYDROGENASE E1 COMPONENT ALPHA SUBUNIT, SOMATIC FORM, MITOCHONDRIAL PRECURSOR			6.56796	0.00016
IPI00025366	TRICAROXYLIC ACID CYCLE	CS	CITRATE SYNTHASE, MITOCHONDRIAL PRECURSOR	1.79228	7e-05	1.78959	3e-05	6.27877	1.09e-09	-1.89005	0.02267	-5.71661	3.75e-36	3.8911	0.00087
IPI00011107	TRICAROXYLIC ACID CYCLE	IDH2	ISOCITRATE DEHYDROGENASE [NADP], MITOCHONDRIAL PRECURSOR	1.67864	0.00549	2.0745	3.89e-09			-1.98771	0.12255	-6.7999	0.00398
IPI00030702	TRICAROXYLIC ACID CYCLE	IDH3A	ISOCITRATE DEHYDROGENASE [NAD] SUBUNIT ALPHA, MITOCHONDRIAL PRECURSOR	2.09059	0.00138	1.68729	0.02309	1.22151	0.66074	-1.03772	0.8759	-1.83724	0.04888
IPI00296053	TRICAROXYLIC ACID CYCLE	FH	FUMARATE HYDRATASE, MITOCHONDRIAL PRECURSOR	2.73494	0.02268	5.83349	5e-05			-1.16367	0.77656			7.21458	0.00204
IPI00291005	TRICAROXYLIC ACID CYCLE	MDH1	MALATE DEHYDROGENASE, CYTOPLASMIC	2.17214	0.00075	1.8497	0.00051	5.10371	0.01404	-1.55852	0.19247	-1.0869	0.80683
IPI00291006	TRICAROXYLIC ACID CYCLE	MDH2	MALATE DEHYDROGENASE, MITOCHONDRIAL PRECURSOR	1.64981	0.00012	1.74389	0.00068	2.69721	0.0003	-2.33746	1.19e-10	-5.09543	1.38e-14	2.656	0.00599
IPI00552036	OXIDATIVE PHOSPHORYLATION	ATP6	ATP SYNTHASE F0 SUBUNIT 6	3.28411	0.01445
IPI00219034	OXIDATIVE PHOSPHORYLATION	NDUFA8	NADH-UBIQUINONE OXIDOREDUCTASE 19 KDA SUBUNIT	2.51007	0.0088	1.89411	0.10427	2.75285	0.058	1.74219	0.152	-1.1593	0.7408
IPI00021785	OXIDATIVE PHOSPHORYLATION	COX5B	CYTOCHROME C OXIDASE POLYPEPTIDE VB, MITOCHONDRIAL PRECURSOR	2.37785	7.89e-11	1.89419	0.00184	-1.63037	0.1097	2.43246	0.07889	-1.25762	0.38075	1.746	0.14048
IPI00026964	OXIDATIVE PHOSPHORYLATION	UQCRFS1	UBIQUINOL-CYTOCHROME C REDUCTASE IRON-SULFUR SUBUNIT, MITOCHONDRIAL PRECURSOR	2.30293	0.00039	1.37828	0.50542	4.42826	0.00151	2.20086	0.15799	-1.40856	0.46767
IPI00013968	OXIDATIVE PHOSPHORYLATION	COX7C	CYTOCHROME C OXIDASE POLYPEPTIDE VIIC, MITOCHONDRIAL PRECURSOR	2.25873	0.01929	1.6907	0.11002	1.09756	0.75492	2.30442	0.03213	1.02911	0.93224
IPI00419266	OXIDATIVE PHOSPHORYLATION	NDUFA6	NADH DEHYDROGENASE (UBIQUINONE) 1 ALPHA SUBCOMPLEX, 6, 14KDA	2.24438	0.00053	1.38429	0.06962	1.48461	0.14759	-1.1403	0.75243	-2.61775	0.15754	1.07952	0.84025
IPI00026570	OXIDATIVE PHOSPHORYLATION	COX7A2	OTTHUMP00000039331	2.24045	0.03708	1.35781	0.33851	1.07929	0.79908	1.87843	0.04755	-1.28709	0.29381	-1.45722	0.102
IPI00218144	OXIDATIVE PHOSPHORYLATION	COX17	CYTOCHROME C OXIDASE COPPER CHAPERONE	2.07125	0.0393	-1.17691	0.63139	-2.67086	0.00472	-1.31914	0.37852	-2.48127	0.02315
IPI00455369	OXIDATIVE PHOSPHORYLATION	ATP5L	HYPOTHETICAL PROTEIN DKFZP566G013	2.02301	0.00609	1.35062	0.19178	1.49728	0.45516	-1.52135	0.17138	-2.65734	6e-05
IPI00219567	OXIDATIVE PHOSPHORYLATION	ATP5C1	34 KDA PROTEIN	1.92992	9.51e-07	2.54633	0.0007	1.53298	0.15296			1.1889	0.54676	1.53868	0.15974
IPI00029133	OXIDATIVE PHOSPHORYLATION	ATP5F1	ATP SYNTHASE B CHAIN, MITOCHONDRIAL PRECURSOR	1.86067	0.0236	2.20836	0.00771					-1.86088	0.63902
IPI00007611	OXIDATIVE PHOSPHORYLATION	ATP5O	ATP SYNTHASE OLIGOMYCIN SENSITIVITY CONFERRAL PROTEIN, MITOCHONDRIAL PRECURSOR	1.84642	0.00028	1.16058	0.37967	1.67573	0.00248	-1.00907	0.94925	-1.97344	3.54e-08	1.28172	0.36985
IPI00029558	OXIDATIVE PHOSPHORYLATION	NDUFC2	NADH-UBIQUINONE OXIDOREDUCTASE SUBUNIT B145B	1.81933	0.04213	2.30271	0.17474			-4.75184	0.27456	-1.04848	0.86784	-1.00175	0.99525
IPI00011770	OXIDATIVE PHOSPHORYLATION	NDUFA4	NADH-UBIQUINONE OXIDOREDUCTASE MLRQ SUBUNIT	1.81347	0.04278	-1.07343	0.75827	-1.07748	0.79983	1.3691	0.29719	-1.25849	0.40571	-1.11133	0.77341
IPI00291328	OXIDATIVE PHOSPHORYLATION	NDUFV2	NADH-UBIQUINONE OXIDOREDUCTASE 24 KDA SUBUNIT, MITOCHONDRIAL PRECURSOR	1.79886	0.01077	1.11518	0.68867	1.14577	0.56801	1.88373	0.04679	-1.31399	0.51161
IPI00303476	OXIDATIVE PHOSPHORYLATION	ATP5B	ATP SYNTHASE BETA CHAIN, MITOCHONDRIAL PRECURSOR	1.78414	0.00336	2.38903	0.00093	8.05055	1.33e-19	-3.12738	3.55e-20	-1.45362	0.49231	4.51367	0.00707
IPI00024920	OXIDATIVE PHOSPHORYLATION	ATP5D	ATP SYNTHASE DELTA CHAIN, MITOCHONDRIAL PRECURSOR	1.75359	0.01472	-1.02352	0.91958	1.0007	0.99758	1.39461	0.16453	-1.34852	0.32218	-1.2918	0.50398
IPI00010810	OXIDATIVE PHOSPHORYLATION	ETFA	ELECTRON TRANSFER FLAVOPROTEIN ALPHA-SUBUNIT, MITOCHONDRIAL PRECURSOR	1.72503	0.00159	1.52504	0.0022	1.24081	0.10603	-1.11785	0.41586	-2.84765	2.26e-08	1.21165	0.64648
IPI00220487	OXIDATIVE PHOSPHORYLATION	ATP5H	ATP SYNTHASE, H+ TRANSPORTING, MITOCHONDRIAL F0 COMPLEX, SUBUNIT D ISOFORM A	1.66978	6e-05	1.04477	0.71398	1.29042	0.08147	1.90062	0.02013	-1.27514	0.29117	-1.46433	0.22818
IPI00025344	OXIDATIVE PHOSPHORYLATION	NDUFS6	NADH-UBIQUINONE OXIDOREDUCTASE 13 KDA-A SUBUNIT, MITOCHONDRIAL PRECURSOR	1.64545	0.17683	2.71055	0.00946	3.11108	0.02131	1.83739	0.37157
IPI00006579	OXIDATIVE PHOSPHORYLATION	COX4I1	CYTOCHROME C OXIDASE SUBUNIT IV ISOFORM 1, MITOCHONDRIAL PRECURSOR	1.58271	0.0323	1.14096	0.27713	1.11741	0.48785	1.2155	0.52084	-1.64194	0.02422	-1.25301	0.55747
IPI00218848	OXIDATIVE PHOSPHORYLATION	ATP5I	ATP SYNTHASE E CHAIN, MITOCHONDRIAL	1.56681	0.00104	-1.0819	0.68646	1.00942	0.97542	1.75084	0.04159	-1.64129	0.00786	-1.90463	0.06147
IPI00178677	OXIDATIVE PHOSPHORYLATION	NDUFS1	NADH-UBIQUINONE OXIDOREDUCTASE 75 KDA SUBUNIT, MITOCHONDRIAL PRECURSOR	1.50703	0.79132	2.829	0.00347			-2.62224	0.58762	-1.86643	0.44835
IPI00015972	OXIDATIVE PHOSPHORYLATION	COX6C	CYTOCHROME C OXIDASE POLYPEPTIDE VIC PRECURSOR	1.46879	0.2463	1.21054	0.55365	3.38644	0.00184	-1.11915	0.7532	-2.25683	0.00725
IPI00017510	OXIDATIVE PHOSPHORYLATION	COX2	CYTOCHROME C OXIDASE SUBUNIT 2	1.46349	0.09815	2.00442	0.00253			-4.58312	0.00063
IPI00440493	OXIDATIVE PHOSPHORYLATION	ATP5A1	ATP SYNTHASE ALPHA CHAIN, MITOCHONDRIAL PRECURSOR	1.33265	0.01986	5.07002	4.08e-08	1.20545	0.74879	-5.03935	5.35e-10
IPI00302673	OXIDATIVE PHOSPHORYLATION	ATPAF1	ATP SYNTHASE MITOCHONDRIAL F1 COMPLEX ASSEMBLY FACTOR 1			3.74261	0.0049
IPI00418382	GLUTAMATE METABOLISM	OPLAH	5-OXOPROLINASE	3.48089	0.02042
IPI00022334	GLUTAMATE METABOLISM	OAT	ORNITHINE AMINOTRANSFERASE, MITOCHONDRIAL PRECURSOR	2.04993	0.00181	1.83688	0.00518			-3.16177	3e-05	-7.14628	0.16903
IPI00018206	GLUTAMATE METABOLISM	GOT2	ASPARTATE AMINOTRANSFERASE, MITOCHONDRIAL PRECURSOR	1.86802	0.36279	8.02001	0.00047
IPI00217871	GLUTAMATE METABOLISM	ALDH4A1	DELTA-1-PYRROLINE-5-CARBOXYLATE DEHYDROGENASE, MITOCHONDRIAL PRECURSOR	1.60315	0.15574	1.61617	0.03708			-2.58842	0.01118
IPI00016801	GLUTAMATE METABOLISM	GLUD1	GLUTAMATE DEHYDROGENASE 1, MITOCHONDRIAL PRECURSOR	1.58703	0.0179	4.45001	0.00067			-3.14846	0.01292
IPI00215687	GLUTAMATE METABOLISM	GLS	SPLICE ISOFORM GAC OF GLUTAMINASE, KIDNEY ISOFORM, MITOCHONDRIAL PRECURSOR			1.15819	0.45609	2.51778	0.0143			-1.67446	0.00675
IPI00296907	FATTY ACID OXIDATION	ACOX1	SPLICE ISOFORM 1 OF ACYL-COENZYME A OXIDASE 1, PEROXISOMAL	3.42519	0.00258	2.46453	0.00376	4.00211	0.03573			1.06459	0.85853
IPI00028031	FATTY ACID OXIDATION	ACADVL	SPLICE ISOFORM 1 OF ACYL-COA DEHYDROGENASE, VERY-LONG-CHAIN SPECIFIC, MITOCHONDRIAL PRECURSOR	2.37325	0.30536	12.4045	0.00247	-1.00939	0.9752
IPI00003482	FATTY ACID OXIDATION	DECR1	2,4-DIENOYL-COA REDUCTASE, MITOCHONDRIAL PRECURSOR	2.35081	0.00797	1.92309	0.02752			1.08352	0.9621	-1.89048	0.33293
IPI00017726	FATTY ACID OXIDATION	HADH2	SPLICE ISOFORM 1 OF 3-HYDROXYACYL-COA DEHYDROGENASE TYPE II	2.02655	0.0356	2.54451	0.02817					-4.87427	0.19235
IPI00300567	FATTY ACID OXIDATION	DCI	SPLICE ISOFORM 1 OF 3,2-TRANS-ENOYL-COA ISOMERASE, MITOCHONDRIAL PRECURSOR	1.71884	0.00153	1.11218	0.82339	1.2025	0.1664	1.80765	0.19257	-1.93301	0.00266	1.05489	0.66697
IPI00550041	FATTY ACID OXIDATION	ECH1	ECH1 PROTEIN	1.52567	0.04017	2.80174	7.67e-06			-2.6551	0.05885
IPI00024993	FATTY ACID OXIDATION	ECHS1	ENOYL-COA HYDRATASE, MITOCHONDRIAL PRECURSOR	1.51276	0.10716	-1.23355	0.50179	-1.74444	0.00096	-1.13048	0.71295	-3.54855	5e-05	-1.72532	0.35797
IPI00005040	FATTY ACID OXIDATION	ACADM	ACYL-COA DEHYDROGENASE, MEDIUM-CHAIN SPECIFIC, MITOCHONDRIAL PRECURSOR	1.50522	0.01908	1.3398	0.0247			-2.10098	0.06851
IPI00022793	FATTY ACID OXIDATION	HADHB	TRIFUNCTIONAL ENZYME BETA SUBUNIT, MITOCHONDRIAL PRECURSOR	1.16094	0.71754	3.93012	7.5e-06	1.23226	0.71264	1.55693	0.61773
IPI00219953	NUCLEOTIDE SYNTHESIS + HOMEOSTASIS	UMP-CMPK	UMP-CMP KINASE	8.07106	0.00112	1.9814	0.12863	3.08525	0.00025	3.83981	0.02735	1.11679	0.71896
IPI00018783	NUCLEOTIDE SYNTHESIS + HOMEOSTASIS	ITPA	INOSINE TRIPHOSPHATE PYROPHOSPHATASE	5.57129	0.03554			4.18284	0.02363			2.8125	0.24839	2.37408	0.11682
IPI00103732	NUCLEOTIDE SYNTHESIS + HOMEOSTASIS	TS	THYMIDYLATE SYNTHASE	3.37573	0.00194	-1.15284	0.64262
IPI00026260	NUCLEOTIDE SYNTHESIS + HOMEOSTASIS	NME2	NUCLEOSIDE DIPHOSPHATE KINASE B	2.42304	0.00951	1.46672	0.21016	1.99924	0.04579			-3.034	0.00181
IPI00002894	NUCLEOTIDE SYNTHESIS + HOMEOSTASIS	POLD1	DNA POLYMERASE DELTA CATALYTIC SUBUNIT DNA synthesis	2.18394	0.01409	-1.33799	0.41891	-1.37031	0.2822	-7.54377	3e-05			-1.32905	0.33402
IPI00016568	NUCLEOTIDE SYNTHESIS + HOMEOSTASIS	AK4	ADENYLATE KINASE ISOENZYME 4, MITOCHONDRIAL	1.8603	7.23e-08	-1.13869	0.42277	-1.04315	0.78166	1.15565	0.66633	-1.63656	5.05e-07
IPI00465256	NUCLEOTIDE SYNTHESIS + HOMEOSTASIS	AK3	GTP:AMP PHOSPHOTRANSFERASE MITOCHONDRIAL	1.59959	0.00535	1.19352	0.38392	1.24383	0.41696			-2.51273	1.76e-07
IPI00292858	NUCLEOTIDE SYNTHESIS + HOMEOSTASIS	ECGF1	THYMIDINE PHOSPHORYLASE PRECURSOR	1.58395	0.09049			-1.43079	0.64695	-3.0673	0.00451	-3.41871	0.00108
IPI00220014	LIPOGENESIS	IDI1	ISOPENTENYL-DIPHOSPHATE DELTA ISOMERASE	4.77579	0.02535	2.16846	0.08316	3.66349	0.01667	2.69209	0.10062	1.69674	0.42419
IPI00010290	LIPOGENESIS	FABP1	FATTY ACID-BINDING PROTEIN, LIVER	3.30078	5.36e-23	1.4256	0.00906	3.54968	0.00094	-1.08166	0.72889	-2.90349	0.00815
IPI00383879	LIPOGENESIS	AADAC	ARYLACETAMIDE DEACETYLASE	3.10764	0.00238									-5.27827	0.00025
IPI00020004	LIPOGENESIS	TMEM97	MAC30 PROTEIN (FRAGMENT)	2.66347	0.018	2.72269	0.00974	2.5155	0.06076	-1.02056	0.95209	-3.19549	0.04008
IPI00418433	LIPOGENESIS	FASN	FATTY ACID SYNTHASE	2.24595	0.02545	1.31262	0.47119	-1.43527	0.34399	-1.69942	0.27326	-2.5542	0.01378
IPI00011569	LIPOGENESIS	ACACA	ACETYL-COA CARBOXYLASE 1	1.83484	0.28319	1.33748	0.68144	1.87271	0.02494	3.18606	0.01133	-1.70439	0.51075	1.32503	0.86494
IPI00026105	LIPOGENESIS	SCP2	NONSPECIFIC LIPID-TRANSFER PROTEIN, MITOCHONDRIAL PRECURSOR	1.61592	5e-05	1.03634	0.75216	-1.12908	0.30275	1.28496	0.32447	-1.635	0.01816	2.91107	0.00361
IPI00019407	LIPOGENESIS	NSDHL	STEROL-4-ALPHA-CARBOXYLATE 3-DEHYDROGENASE, DECARBOXYLATING			7.16691	0.00479					-5.1774	0.04023
IPI00021766	CHAPERONE	RTN4	SPLICE ISOFORM 1 OF RETICULON 4	4.49132	0.03084	1.46502	0.19916	3.67144	0.00056	-2.18681	0.12133	-2.59316	0.08202
IPI00075248	CHAPERONE	CALM3	CALMODULIN	3.40606	0.00248	5.27646	0.00141
IPI00032826	CHAPERONE	ST13	HSC70-INTERACTING PROTEIN	3.06492	0.00045	1.30598	0.07802	2.20592	0.00026	3.71295	1.62e-12	1.46912	0.00735	1.19627	0.54475
IPI00218993	CHAPERONE	HSPH1	SPLICE ISOFORM BETA OF HEAT-SHOCK PROTEIN 105 KDA	2.55837	0.01766	2.6504	0.03285	11.6658	2e-05	5.24011	0.00011	3.93509	0.0039
IPI00000213	CHAPERONE	C16orf49	HSPC326 (FRAGMENT)	2.51192	0.03489
IPI00025512	CHAPERONE	HSPB1	HEAT-SHOCK PROTEIN BETA-1	2.46652	0.02604	1.03746	0.91548	2.07981	0.02785	2.0522	0.01762	1.03492	0.94235
IPI00218924	CHAPERONE	CHP	CALCIUM-BINDING PROTEIN P22	2.3539	0.00552	1.38954	0.38191	1.12986	0.7732	2.12056	0.04656	-2.00488	0.01007
IPI00029628	CHAPERONE	RCN2	RETICULOCALBIN 2 PRECURSOR	2.12851	0.03204	-1.40944	0.46084	1.95813	0.7733	1.83428	0.47343			1.74813	0.00024
IPI00020599	CHAPERONE	CALR	CALRETICULIN PRECURSOR	1.98607	0.00267	1.37883	0.34802	-1.16436	0.50869	1.17775	0.55095	-1.82692	0.00654	-1.74265	0.26763
IPI00006378	CHAPERONE	HSPC016	HYPOTHETICAL PROTEIN HSPC016	1.94744	0.00671	1.07002	0.82762	-2.69844	0.00421	-1.67546	0.14268
IPI00304925	CHAPERONE	HSPA1A	HEAT SHOCK 70 KDA PROTEIN 1	1.85528	0.0011	1.34713	0.17811	-1.06702	0.81512	-1.42817	0.4185	-1.05006	0.87104	1.25841	0.54485
IPI00382470	CHAPERONE	HSPCA	HEAT SHOCK PROTEIN HSP 90-ALPHA	1.82859	0.00015	-1.05124	0.86581	1.68794	0.25483	-1.39749	0.36158	-2.99793	0.00015
IPI00472102	CHAPERONE	HSPD1	60 KDA HEAT SHOCK PROTEIN, MITOCHONDRIAL PRECURSOR	1.6899	4.27e-09	1.21341	0.0919	-1.0307	0.81721	1.17042	0.22394	-1.68151	0.00042	-1.30116	0.1259
IPI00333771	CHAPERONE	CALD1	SPLICE ISOFORM 5 OF CALDESMON	1.59438	0.00447	1.08213	0.8148	-1.56917	0.15586	1.07462	0.75539	-1.2054	0.43215	-1.07757	0.80564
IPI00020984	CHAPERONE	CANX	CALNEXIN PRECURSOR	1.56959	0.00701	1.24523	0.25225	1.48983	0.19634	-1.22704	0.56851	-1.67404	0.10506	-3.23505	0.00146
IPI00007702	CHAPERONE	HSPA2	HEAT SHOCK-RELATED 70 KDA PROTEIN 2	1.28948	0.45816	-4.46401	0.00496	-1.0089	0.97701	-2.72227	0.00704	-1.2062	0.60204	-1.24741	0.56784
IPI00003362	CHAPERONE	HSPA5	78 KDA GLUCOSE-REGULATED PROTEIN PRECURSOR	1.14851	0.25117	-1.32965	0.0005	1.46844	0.02247	1.01426	0.95142	-1.56356	0.00697	1.44429	0.59199
IPI00028570	NRF2 STRESS RESPONSE	GSK3B	SPLICE ISOFORM 1 OF GLYCOGEN SYNTHASE KINASE-3 BETA	7.24972	0.00056					2.32887	0.51512
IPI00216298	NRF2 STRESS RESPONSE	TXN	THIOREDOXIN	4.8029	1.65e-07	2.06057	0.1455			4.81862	0.01245	2.38648	0.01441
IPI00329629	NRF2 STRESS RESPONSE	DNAJC7	DNAJ HOMOLOG SUBFAMILY C MEMBER 7	4.36042	0.00264	2.05969	0.18389	-1.34571	0.52146	1.48831	0.56728	-2.12309	0.19493
IPI00219757	NRF2 STRESS RESPONSE	GSTP1	GLUTATHIONE S-TRANSFERASE P	3.53195	1.32e-24	1.45286	0.03893	3.55495	4.16e-14	-1.2619	0.65379	-1.73247	0.00304	1.24692	0.47744
IPI00418382	NRF2 STRESS RESPONSE	OPLAH	5-OXOPROLINASE	3.48089	0.02042
IPI00013894	NRF2 STRESS RESPONSE	STIP1	STRESS-INDUCED-PHOSPHOPROTEIN 1	2.48602	0.00084	1.89307	0.01067	1.13447	0.64108	-1.13999	0.71189	-1.06656	0.86535	-1.33178	0.59825
IPI00008454	NRF2 STRESS RESPONSE	DNAJB11	DNAJ HOMOLOG SUBFAMILY B MEMBER 11 PRECURSOR	2.47403	0.23883	2.32397	0.00972	5.20158	0.00294			1.28598	0.44179	-1.10823	0.83643
IPI00019755	NRF2 STRESS RESPONSE	GSTO1	GLUTATHIONE TRANSFERASE OMEGA 1	2.46398	3.51e-06	1.20679	0.31942			1.64958	0.1999	-1.10901	0.7731
IPI00000874	NRF2 STRESS RESPONSE	PRDX1	PEROXIREDOXIN 1	2.25806	8.77e-06	1.37095	0.09024	1.40318	0.05564	1.4169	0.01757	-1.45785	0.08138	-1.68645	0.02322
IPI00218733	NRF2 STRESS RESPONSE	SOD1	SUPEROXIDE DISMUTASE	2.18321	1.2e-07	-1.03728	0.85604	1.28543	0.30326	1.44851	0.1898	-1.53927	0.09129	-1.23529	0.47896
IPI00215893	NRF2 STRESS RESPONSE	HMOX1	HEME OXYGENASE 1	2.17251	0.0054	-1.31787	0.55885	-1.68171	0.81527	-2.44461	0.01195	-4.15401	0.00141
IPI00419501	NRF2 STRESS RESPONSE	FTH1	FERRITIN HEAVY CHAIN	2.12192	0.00025	1.1834	0.44302	1.12177	0.85885	-2.01767	0.07963	-1.53579	0.16401
IPI00375676	NRF2 STRESS RESPONSE	FTL	FERRITIN LIGHT CHAIN	2.11357	0.04061	1.04872	0.88589	2.02664	0.04906	1.70669	0.08576	1.04768	0.898
IPI00029715	NRF2 STRESS RESPONSE	AOX1	ALDEHYDE OXIDASE	1.68649	0.08329	1.08091	0.71344	1.92859	0.00067	-1.61853	0.4036	-4.11331	0.00025
IPI00021428	NRF2 STRESS RESPONSE	ACTA1	ACTIN, ALPHA SKELETAL MUSCLE	1.44562	2.12e-07	1.47832	0.01033	1.33813	0.02434	-1.07261	0.49721	-2.42194	7.04e-13	1.54128	0.0063
IPI00465436	NRF2 STRESS RESPONSE	CAT	CATALASE	1.36251	0.16476	1.1271	0.47482	4.61995	3.73e-11	-1.762	0.00893	-6.72892	3.9e-22
